# Supplementary material
Source: PubMed Central journal article supplement (PMC6533163)
Supplement: NIHMS1524469-supplement-1.pdf [file NIHMS1524469-supplement-1.pdf]

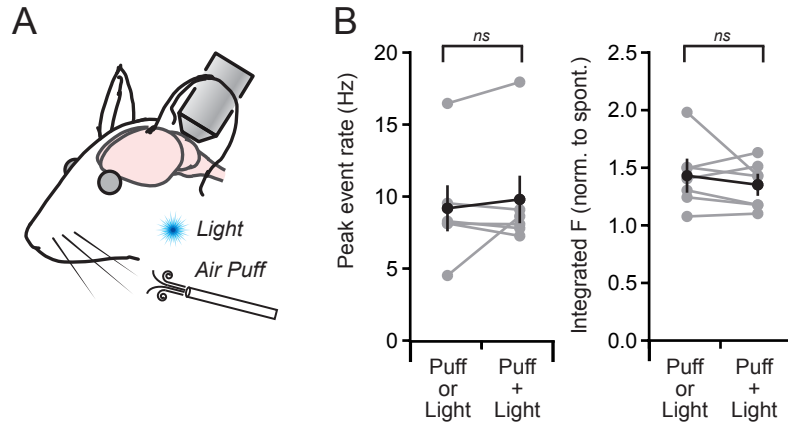

### Supplemental Figure 1

*Non-additive effect of simultaneous presentation of different sensory stimuli on PC Ca<sup>2+</sup> events. Related to Figure 1.*

**(A)** In the same mouse, a visual or a somatosensory stimulus was presented alone or in simultaneous combination.

**(B)** Summary plots showing the change in frequency and size of PC dendritic Ca<sup>2+</sup> events both to individual sensory modalities or to their simultaneous presentation. Data are mean  $\pm$  SEM with individual mice in gray; ns, not significant,  $p = 0.45$  and  $0.40$ ; paired Student's  $t$ -test ( $n = 6-7$  mice).

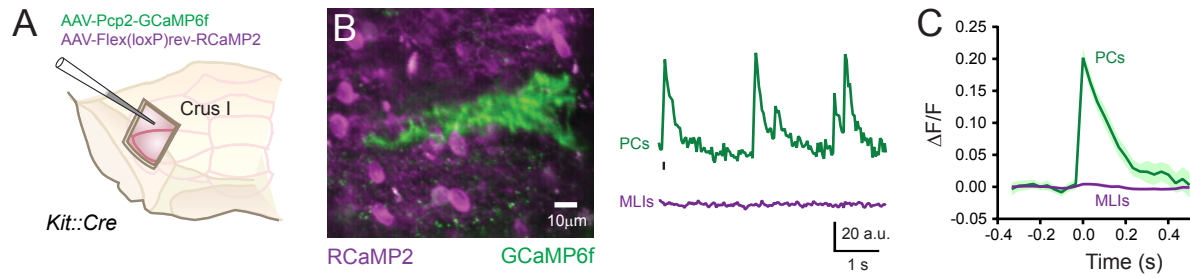

## Supplemental Figure 2

*Lack of coincident MLI activity with spontaneous  $Ca^{2+}$  events in PC dendrites.*

*Related to Figure 2.*

**(A)** MLIs in *Kit::Cre* mice were transduced with AAV containing Cre-dependent RCaMP2, a red genetically encoded  $Ca^{2+}$  indicator. A second AAV containing the green  $Ca^{2+}$  indicator GCaMP6f, expressed under control of the *Pcp2* promoter, transduced PCs.

**(B)** Left: Image of an isolated, GCaMP6f-expressing PC dendrite surrounded by RCaMP2-expressing MLIs. Right: Simultaneous, dual-color  $Ca^{2+}$  activity measurements from PCs and MLIs during quiescence. An isolated dendritic  $Ca^{2+}$  event is demarcated by the black tick mark.

**(C)** Average of MLI  $Ca^{2+}$  activity aligned to the occurrence of spontaneous CF-evoked dendritic  $Ca^{2+}$  events ( $n = 212$ ; 3 mice) in nearby PCs (within  $50 \mu\text{m}$ ).

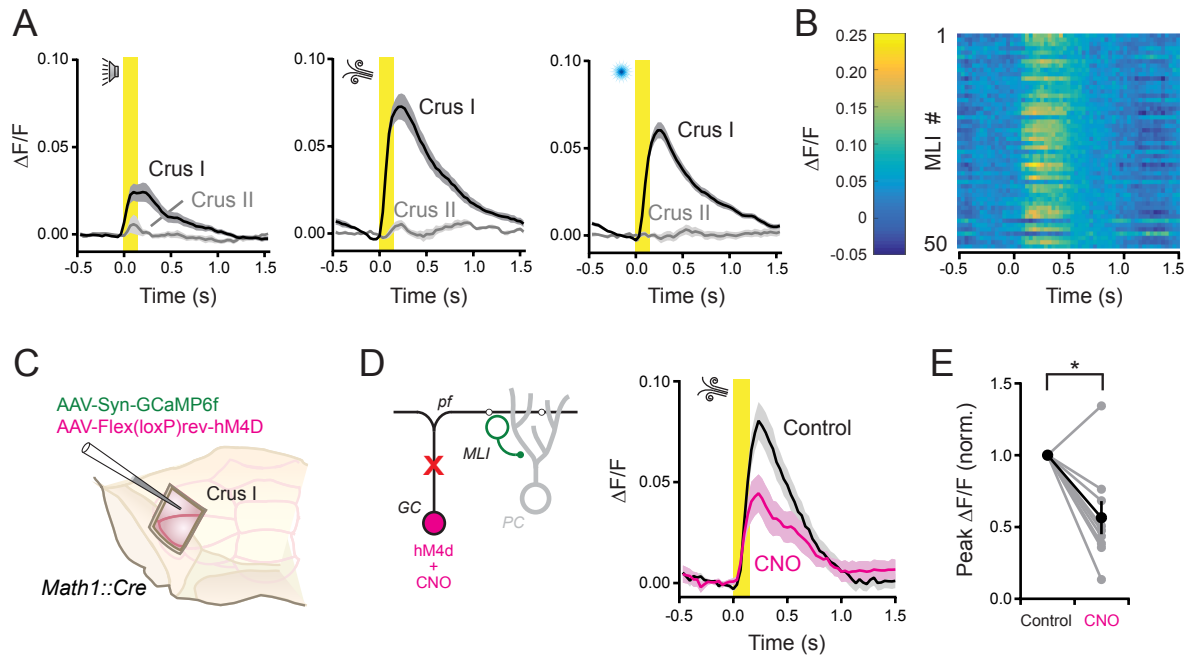

### Supplemental Figure 3

*Granule cell-mediated excitation contributes to the sensory-evoked activation of MLIs. Related to Figure 2.*

- (A) Trial-averaged ensemble responses of MLIs to different sensory modalities, measured in two different lobules across mice (n = 6-20 trial blocks; 5-7 mice per condition).
- (B)  $\text{Ca}^{2+}$  activity measurements from all identified MLIs in a single field of view from one mouse. The responses are an average of the repeated stimulation of whiskers with an air puff (n = 15).
- (C) AAV containing Cre-dependent hM4d was injected into *Math1::Cre* mice. A second virus transduced MLIs with GCaMP6f.
- (D) Average sensory-evoked  $\text{Ca}^{2+}$  response in MLIs in control and after CNO administration to suppress the activity of hM4d-expressing granule cells.
- (E) Chemogenetic suppression of granule cell activity significantly reduced peak MLI responses to sensory stimuli (p = 0.005, Student's paired t-test; n = 9 regions; 3 mice). Black symbols: mean. Gray symbols: individual regions.

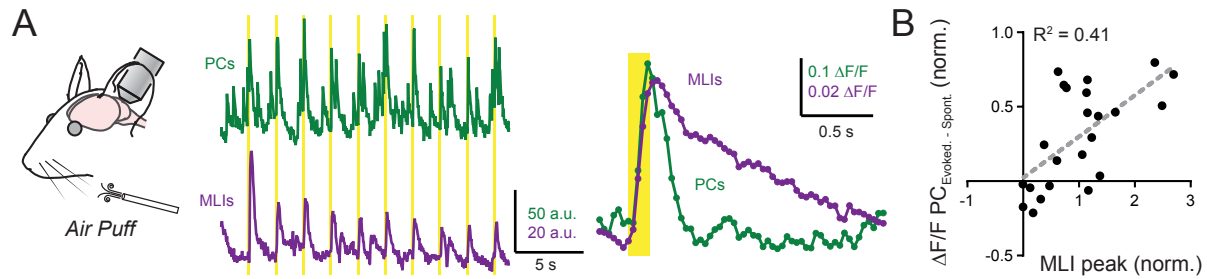

### Supplemental Figure 4

*MLIs do not account for differences in sensory-evoked  $\text{Ca}^{2+}$  events in PC dendrites.*

*Related to Figure 2.*

**(A)** Left: Simultaneous dual-color activity measurements from PCs and MLIs during repeated stimulation of the whiskers with an air puff. Yellow bars indicate timing of the sensory stimuli. Right: Superimposition of sensory-evoked  $\text{Ca}^{2+}$  events in PC dendrites and the response elicited in the surrounding MLI ensemble.

**(B)** Relationship between the cue-dependent enhancement of  $\text{Ca}^{2+}$  events in PC dendrites and the peak amplitude of the sensory-evoked response in MLIs. Each point represents the average response from simultaneous activity measurements of MLI ensemble activity and the change in PC dendritic  $\text{Ca}^{2+}$  size from a block of trials (measurements from 3 mice).

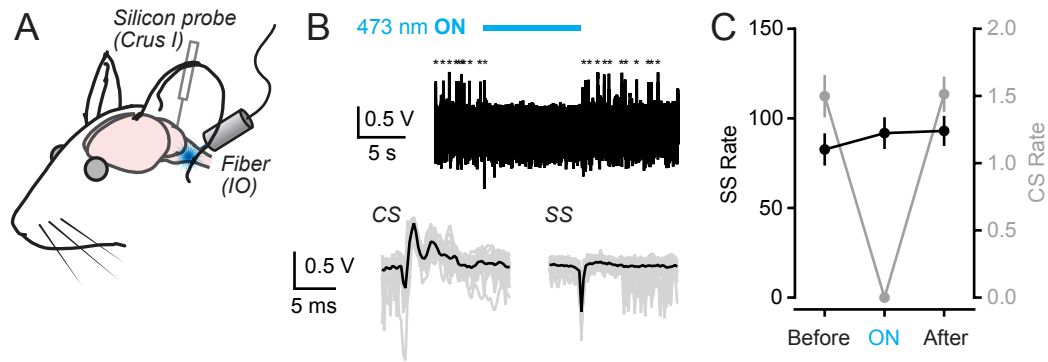

### Supplemental Figure 5

*Brief suppression of inferior olive activity does not affect PC simple spiking.*

*Related to Figure 3.*

**(A)** Activity measurements from PC units in Crus I recorded with a silicon probe while animals sat in quiescence. *GtACR2*-expressing neurons in the inferior olive were suppressed using blue light illumination with an implanted optical fiber ( $\lambda = 473$ ;  $250 \mu\text{W}$ ; 10 s).

**(B)** Top: Continuous record from a PC unit before, during, and after optogenetic suppression of the inferior olive. Complex spikes are marked with an asterisk. Bottom: Average (black traces) and individual examples (gray traces) of complex spikes (CS) and simple spikes (SS).

**(C)** Loss of complex spikes were used to classify PC units sensitive to inferior olive activity suppression. In these same units ( $n = 15$ , 3 mice), simple spiking was not significantly affected by the optogenetic stimulus ( $p = 0.66$ , ANOVA with Tukey's multiple comparison test).

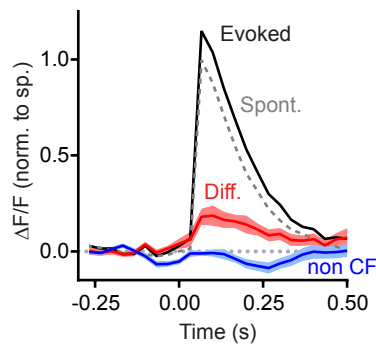

### Supplemental Figure 6

*Post-hoc deletion of CF-evoked events does not reveal a residual, dendritic  $Ca^{2+}$  response.*

*Related to Figure 3.*

Average spontaneous  $Ca^{2+}$  events as well as those evoked by sensory stimuli in a sample of PC dendrites from control mice. For the latter condition, all algorithmically identified events (putative CF-evoked responses) were eliminated from the analysis (see Star Methods). The remaining response, in blue, fails to indicate a residual component attributable to the activity of parallel fibers (n = 15 trial blocks from 7 mice).

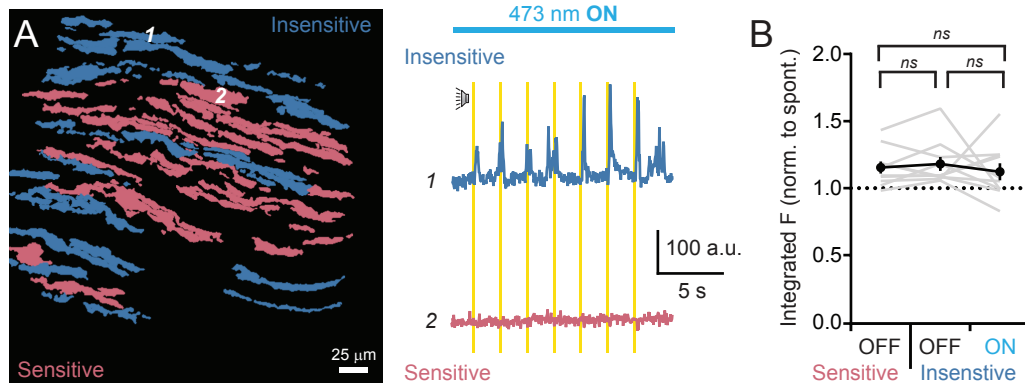

### Supplemental Figure 7

*Specific effects of inferior olive activity suppression on CF-evoked signaling in PCs.*

*Related to Figure 3.*

**(A) Left:** In a field of view, PC dendrites demarcated in red were sensitive to suppression of the inferior olive as determined by the complete loss of spontaneous Ca<sup>2+</sup> events during the illumination period. All other neighboring PCs demarcated in blue were insensitive to this manipulation (maintained normal spontaneous Ca<sup>2+</sup> event rates). Right: Example traces from corresponding PCs marked in the image during sensory cues (timing in yellow) show either the presence or absence of stimulus-evoked activity in insensitive and sensitive cells, respectively.

**(B)** For sensory-triggered Ca<sup>2+</sup> events in the two classified populations of PCs, comparisons of the peak amplitudes of integrated responses. Black symbols mark means ± SEM. Gray lines show individual experiments (n = 10 experiments, 4 mice). Note that in PCs insensitive to olivary suppression, there were no significant differences in activity during the optogenetic stimulus (p = 0.53, paired Student's t-test).

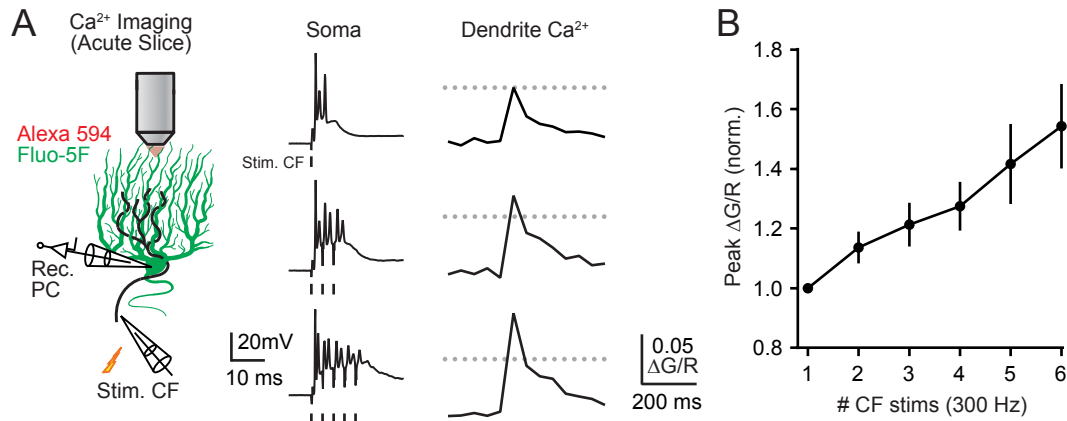

### Supplemental Figure 8

*PC dendritic Ca<sup>2+</sup> signals increase with the number of high-frequency, presynaptic CF stimuli. Related to Figure 4.*

**(A)** Left: In acute cerebellar slices, PCs were filled with a Ca<sup>2+</sup> indicator dye during whole-cell, current-clamp recordings. Activity was elicited in PCs by CF stimulation. Representative simultaneous measurements of somatic complex spikes (middle) and volume-averaged dendritic Ca<sup>2+</sup> signals (right) elicited in a PC in response to increasing numbers of CF stimuli delivered at 300 Hz.

**(B)** After the first stimulus, the average peak amplitude of the PC Ca<sup>2+</sup> response increased proportionally with each additional presynaptic spike in the burst. Mean dendritic responses, normalized to a single CF stimulus, are indicated  $\pm$  SEM ( $n = 10$  dendritic regions, 5 cells).
